# Supplementary material
Source: Springer Nature journal article supplement (https://www.springermedizin.de/resource/supplementary/12888_2011_963_MOESM1_ESM.pdf/9479536)
Supplement: MOESM1 [file 9479536]

Enrollment and Baseline

439 Potential participants screened on webpage

202 Excluded  
123 did not meet inclusion criteria  
36 non responsive  
43 declined further participation

237 Interviewed

76 Excluded after interview  
53 did not meet inclusion criteria  
23 declined further participation

161 Invited to pre-treatment assessments

26 did not finish pre-treatment assessments  
2 declined further participation

133 Randomized

Allocation

Treatment

**Bibliotherapy with therapist telephone support (n=44)**

**Bibliotherapy (n=45)**

**Waiting list Control (n=44)**

1 drop-out from treatment;  
1 questionnaire &  
3 diaries lost to post-assessment

2 drop-outs from treatment;  
1 questionnaire &  
7 diaries lost to post-assessment

1 diary at pre-treatment lost due to poor data quality  
5 questionnaires &  
8 diaries lost to post-assessment

Follow-Up

**Post-assessment**  
43 questionnaires  
41 sleep diaries  
44 interviews

**Post-assessment**  
44 questionnaires  
38 sleep diaries  
45 interviews

**Post-assessment**  
39 questionnaires  
36 sleep diaries  
43 interviews

3 questionnaires &  
4 diaries lost to follow-up assessment

6 questionnaires &  
8 diaries lost to follow-up assessment

5 questionnaires &  
5 diaries lost to follow-up assessment

**Follow-up assessment**  
41 questionnaires  
40 sleep diaries  
44 interviews

**Follow-up assessment**  
39 questionnaires  
37 sleep diaries  
44 interviews

**Follow-up assessment**  
39 questionnaires  
39 sleep diaries  
41 interviews
